# Supplementary material for: Low morphological disparity and decelerated rate of limb size evolution close to the origin of birds
Source: Springer Nature journal article supplement (doi:10.1038/s41559-023-02091-z), 2023-06-05
Supplement: 41559_2023_2091_MOESM1_ESM.pdf [file 41559_2023_2091_MOESM1_ESM.pdf]

# Low morphological disparity and decelerated rate of limb size evolution close to the origin of birds

---

In the format provided by the authors and unedited

---

**CONTENTS:**

1. Supplementary Figures 1–23
2. Supplementary Tables 1–11

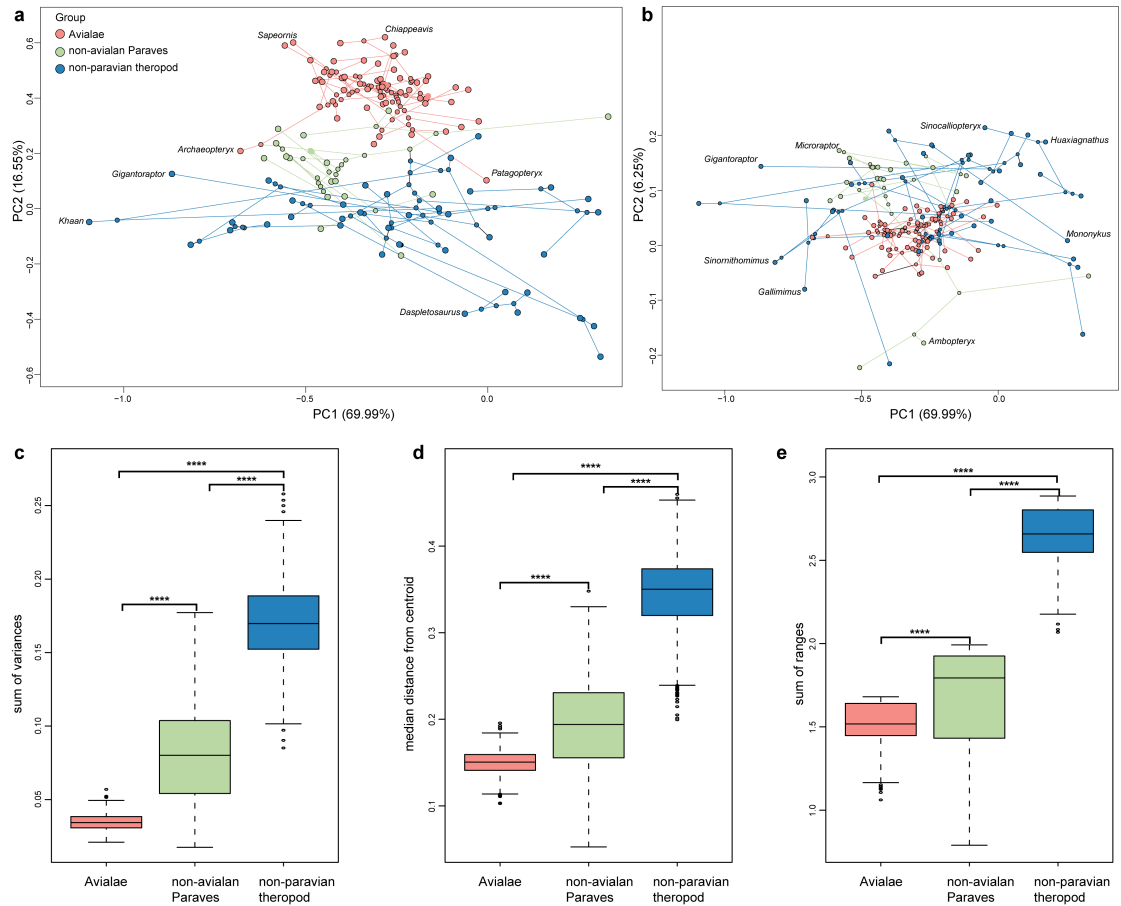

**Supplementary Fig. 1. Morphological disparity of appendicular elements of**

**Mesozoic theropods.** The result is derived from super tree II. **a, b,**

Phylomorphospace of the first three principal components (PCs) of both fore- and hindlimb elements. **c–e,** Comparison of morphological disparity among subgroups of Mesozoic theropods (The boxes represent the median, the first and the third quartile of the disparity;  $n = 109$  species): sum of variances (**c**), median distance from centroid (**d**), and sum of ranges (**e**). Morphological disparity was compared using Welch's  $t$ -test for statistical significance (\*\*\*\*two-sided  $p$ -value threshold  $<0.05$ ).

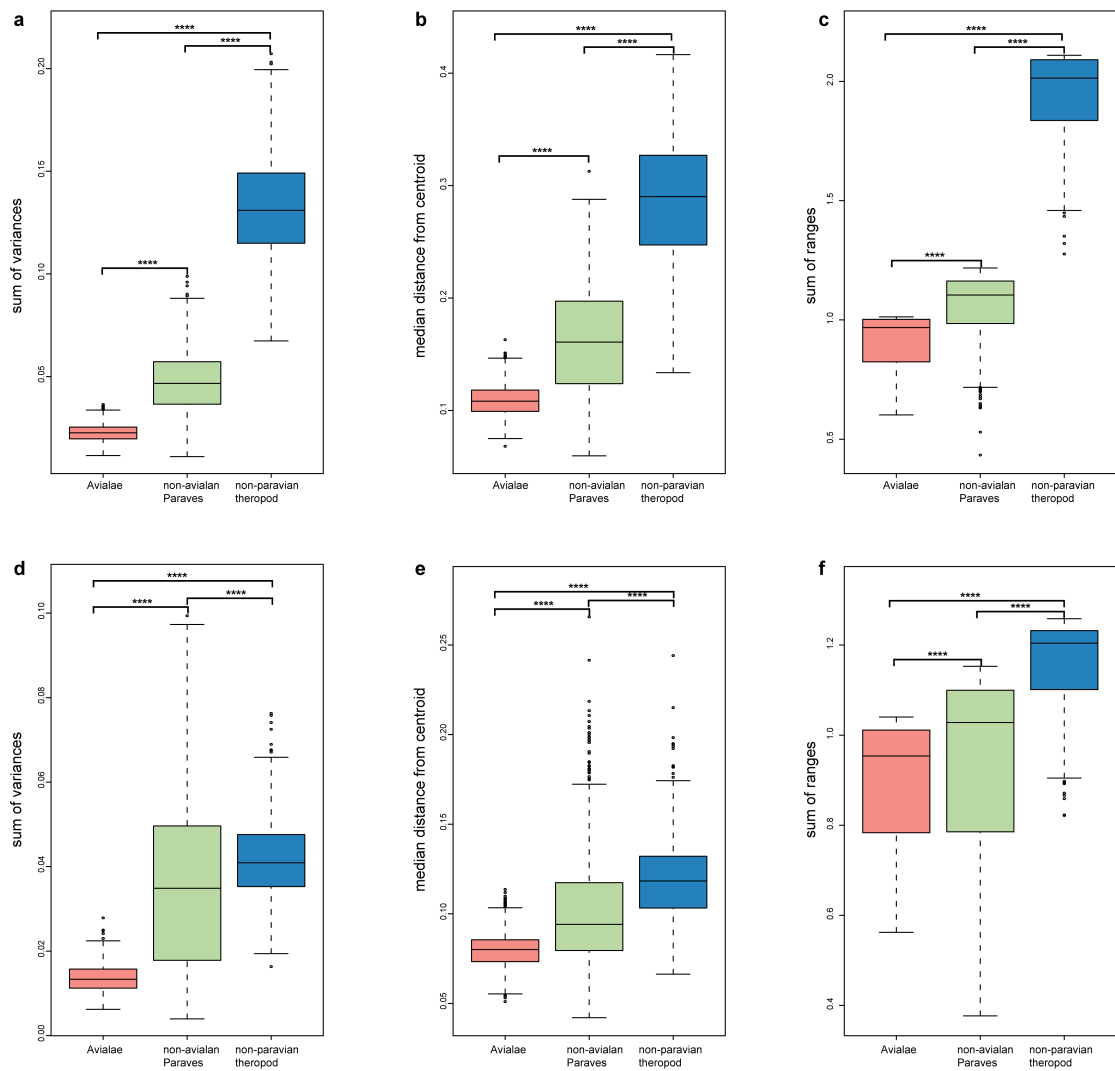

**Supplementary Fig. 2. Comparison of morphological disparity of forelimb and hindlimb among Mesozoic theropods.** The result is derived from super tree II. **a–c**, Forelimb. **d–e**, Hindlimb. Morphological disparity is quantified using three metrics: sum of variances (**a, d**), median distance from centroid (**b, e**), and sum of ranges (**c, f**). The boxes represent the median, the first and the third quartile of the disparity;  $n = 109$  species (**a–f**). Morphological disparity was compared using Welch’s  $t$ -test for statistical significance (\*\*\*\*two-sided  $p$ -value threshold  $<0.05$ ).

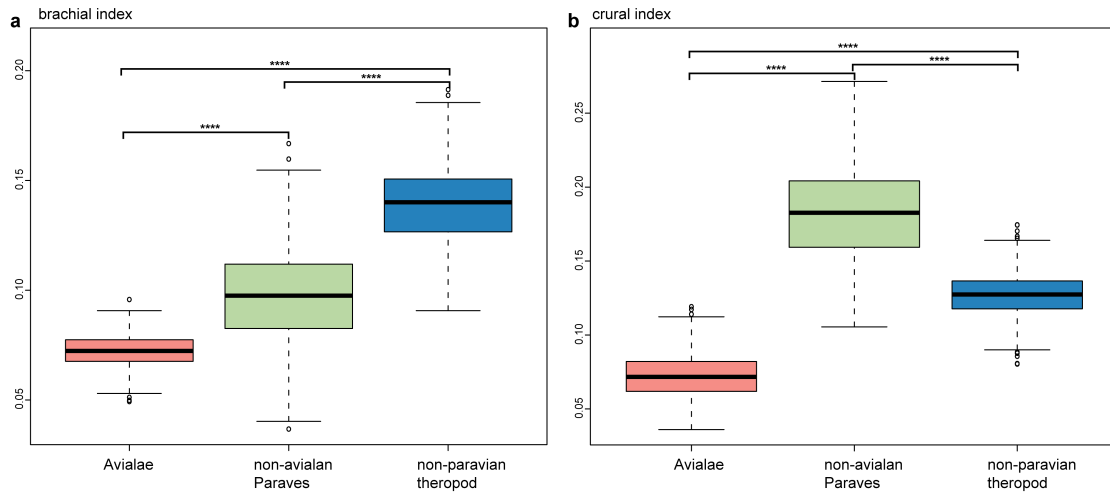

**Supplementary Fig. 3. Comparison of two functional indices of Mesozoic**

**theropods.** The result is derived from super tree II. **a**, Branchial index ( $n = 109$

species). **b**, Crural index ( $n = 109$  species). The boxes represent the median, the first

and the third quartile of the disparity. Morphological disparity was compared using

Welch's  $t$ -test for statistical significance (\*\*\*\*two-sided  $p$ -value threshold  $< 0.05$ ).

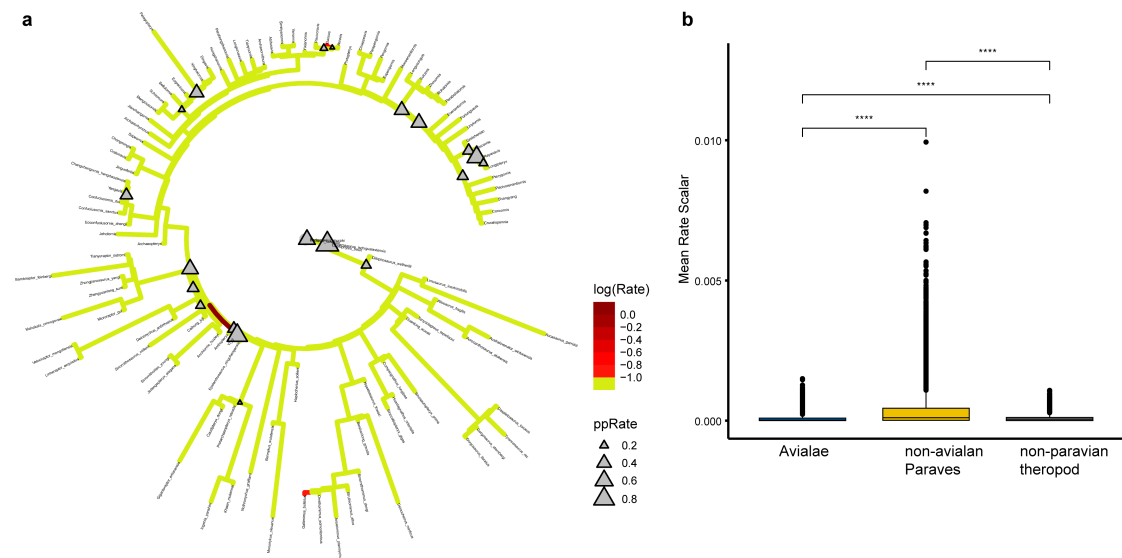

**Supplementary Fig. 4. Evolutionary rate and rate shift of appendicular elements of Mesozoic theropods.** The result is derived from super tree II. **a**, Branch specific evolutionary rates and rate shifts of all limb elements (Branch specific evolutionary rates are denoted by the color gradients. Posterior probabilities of rate shifts are indicated by the relative size of the grey triangles). **b**, Comparison of evolutionary rate of subgroups of Mesozoic theropods (The boxes represent the median, the first and the third quartile of the mean rate scalar;  $n = 109$  species). The mean rate scalar is the mean of the rate scalars calculated in the post-burn-in posterior distribution under the variable rate evolutionary model. Evolutionary rate among subgroups were compared using a nonparametric t-test for statistical significance (\*\*\*\*:  $p < 0.00005$ ).

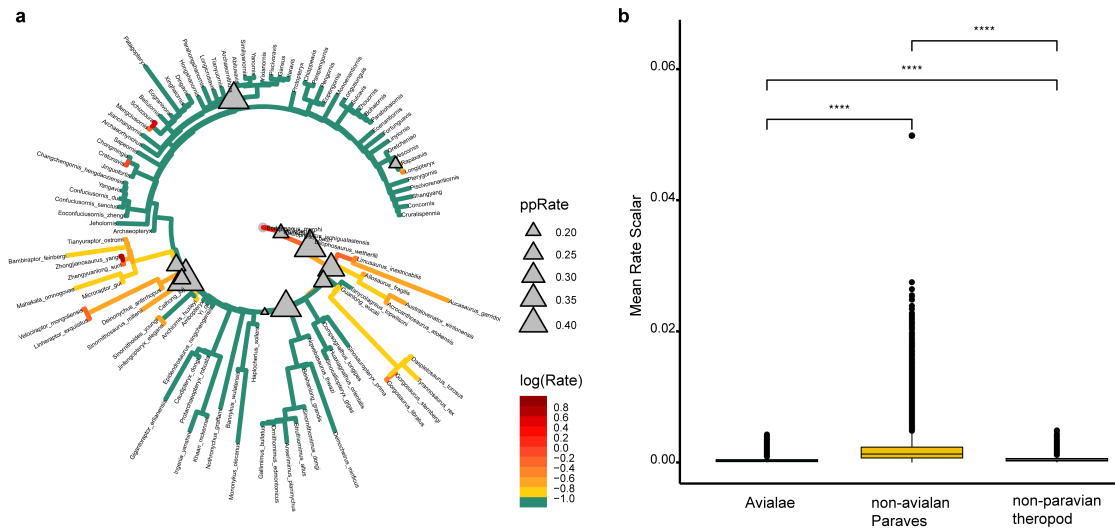

**Supplementary Fig. 5. Evolutionary rate and rate shift of brachial index across Mesozoic theropod phylogeny.** The result is derived from super tree II. **a**, Branch specific evolutionary rates and rate shifts (Branch specific evolutionary rates are denoted by the color gradients. Posterior probabilities of rate shifts are indicated by the relative size of the grey triangles). **b**, Comparison of evolutionary rate of subgroups of Mesozoic theropods (The boxes represent the median, the first and the third quartile of the mean rate scalar;  $n = 109$  species). The mean rate scalar is the mean of the rate scalars calculated in the post-burn-in posterior distribution under the variable rate evolutionary model. Evolutionary rate among subgroups were compared using a nonparametric t-test for statistical significance (\*\*\*\*:  $p < 0.00005$ ).

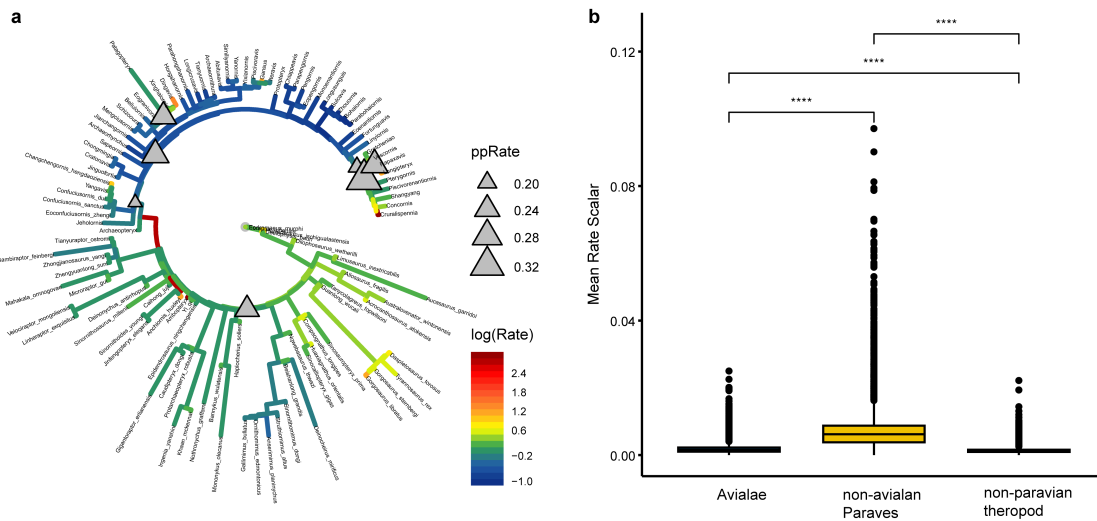

**Supplementary Fig. 6. Evolutionary rate and rate shift of crural index across Mesozoic theropod phylogeny.** The result is derived from super tree II. **a**, Branch specific evolutionary rates and rate shifts (Branch specific evolutionary rates are denoted by the color gradients. Posterior probabilities of rate shifts are indicated by the relative size of the grey triangles). **b**, Comparison of evolutionary rate of subgroups of Mesozoic theropods (The boxes represent the median, the first and the third quartile of the mean rate scalar;  $n = 109$  species). The mean rate scalar is the mean of the rate scalars calculated in the post-burn-in posterior distribution under the variable rate evolutionary model. Evolutionary rate among subgroups were compared using a nonparametric t-test for statistical significance (\*\*\*\*:  $p < 0.00005$ ).



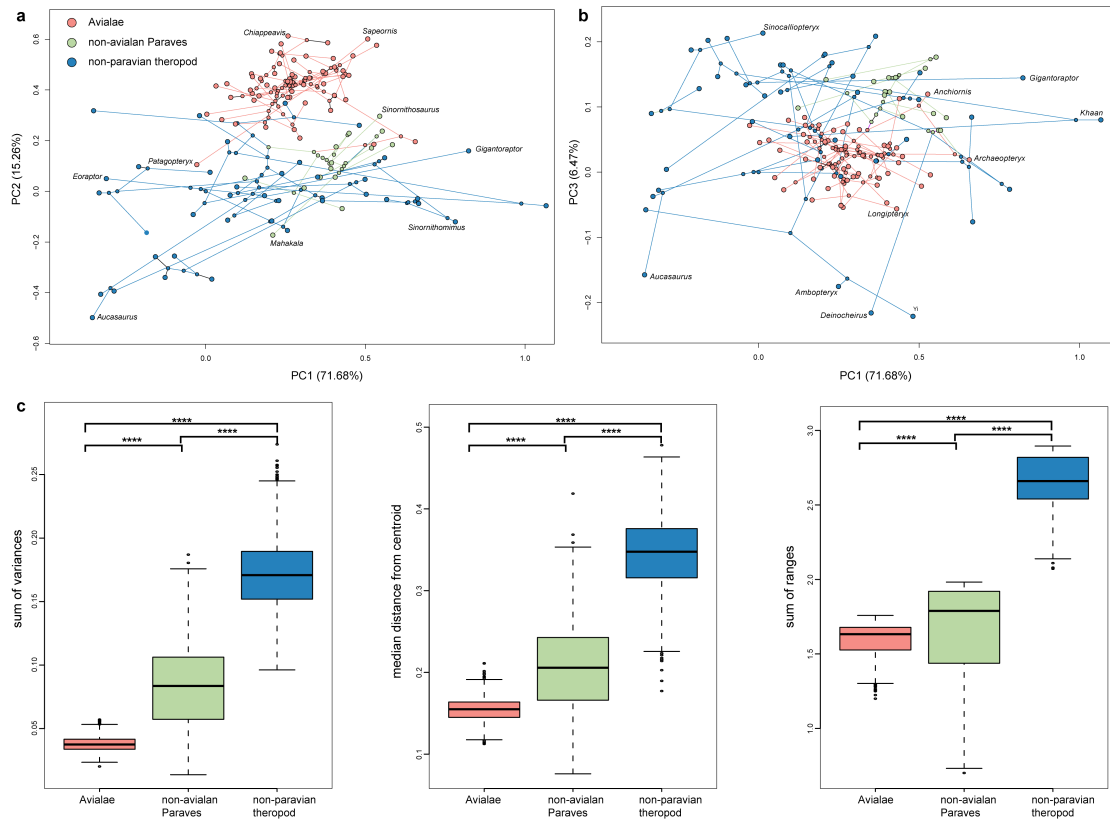

**Supplementary Fig. 7. Morphological disparity of appendicular elements of**

**Mesozoic theropods.** The result is derived from super tree III. **a, b,**

Phylomorphospace of the first three principal components (PCs) of both fore- and

hindlimb elements. **c,** Comparison of morphological disparity among subgroups of

Mesozoic theropods (The boxes represent the median, the first and the third quartile

of the morphological disparity;  $n = 109$  species). Morphological disparity was

compared using Welch's  $t$ -test for statistical significance (\*\*\*\*two-sided  $p$ -value

threshold  $<0.05$ ).

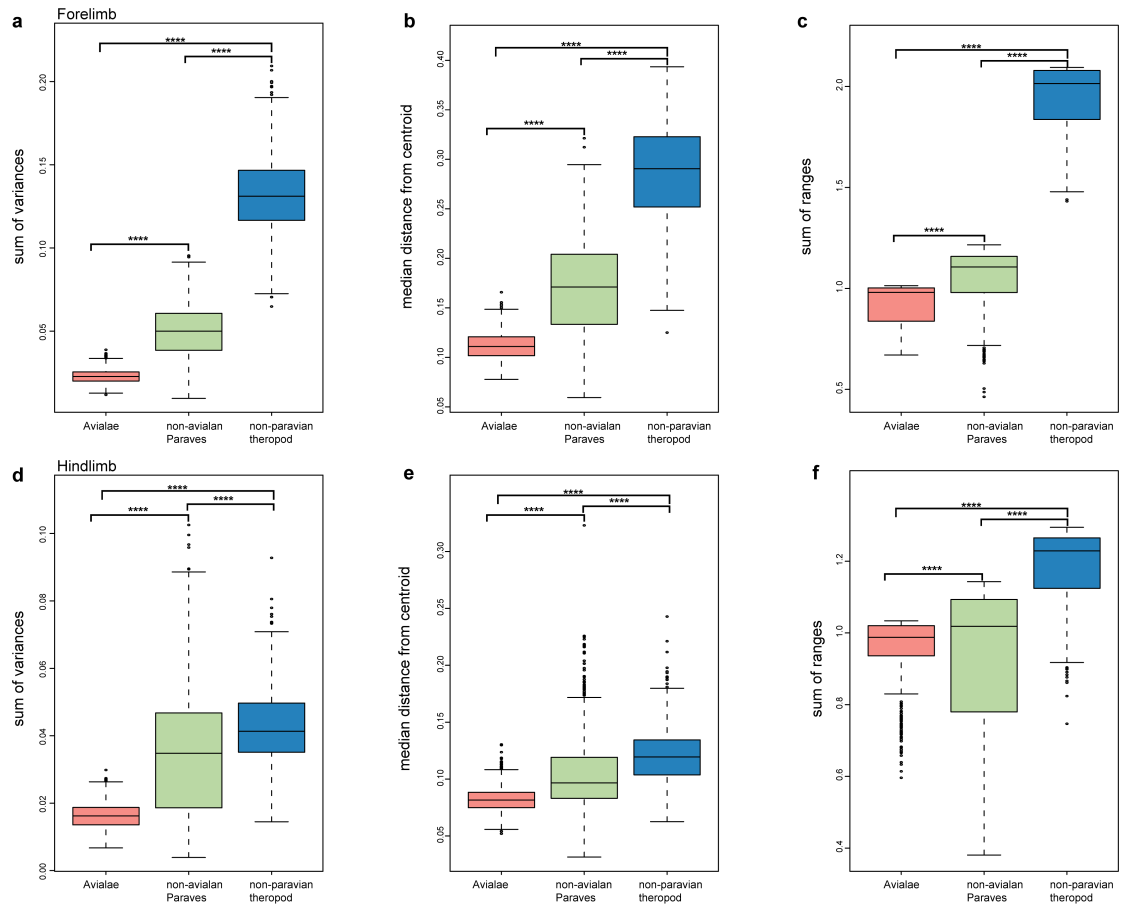

**Supplementary Fig. 8. Comparison of morphological disparity of forelimb and hindlimb among Mesozoic theropods.** The result is derived from super tree III. **a–c**, Forelimb. **d–e**, Hindlimb. Morphological disparity is quantified using three metrics (The boxes represent the median, the first and the third quartile of the morphological disparity;  $n = 109$  species): sum of variances (**a**, **d**), median distance from centroid (**b**, **e**), and sum of ranges (**c**, **f**). Morphological disparity was compared using Welch's  $t$ -test for statistical significance (\*\*\*\*two-sided  $p$ -value threshold  $<0.05$ ).

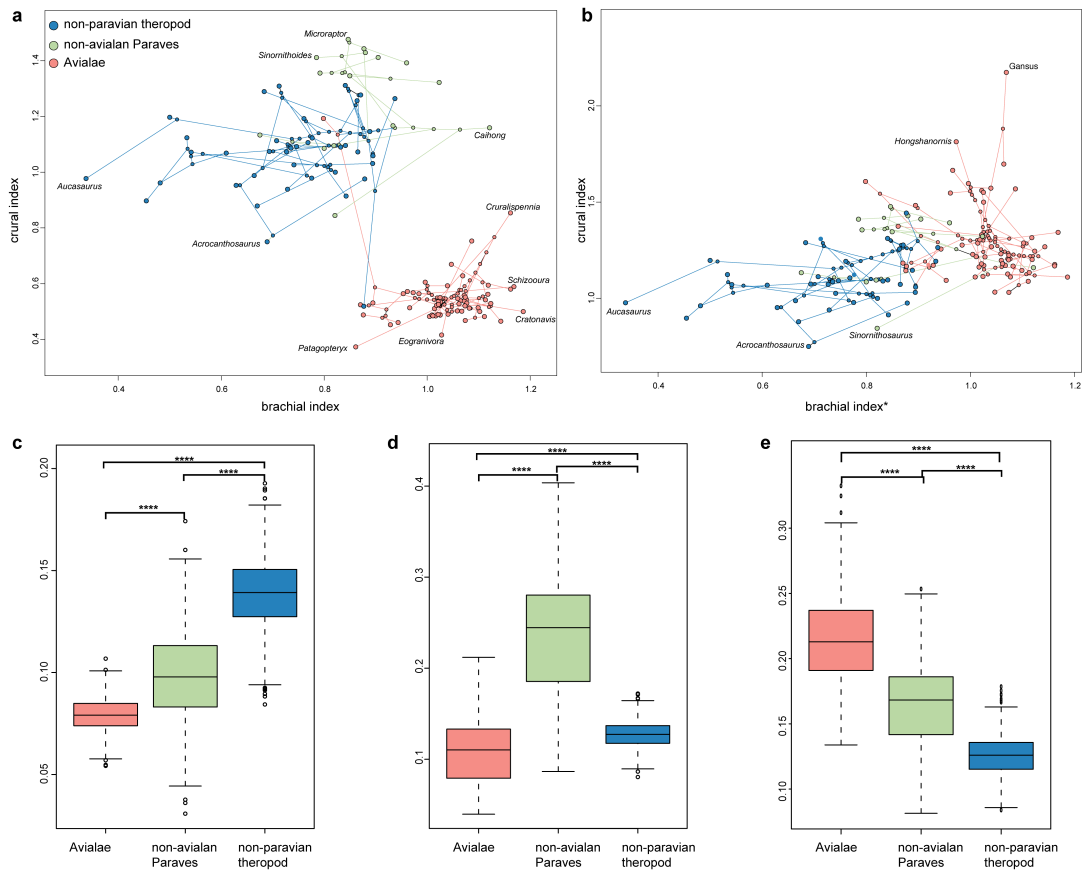

**Supplementary Fig. 9. Evolutionary changes of brachial (BI) and crural (CI) indices across Mesozoic theropod phylogeny.** The result is derived from super tree III. **a**, Phylomorphospace of BI and crural CI (CI is calculated differently for avialan and non-avian taxa; see Method); **b**, Phylomorphospace of BI and crural CI (CI is calculated the same way for avialan and non-avian taxa; see Method). **c–e**, Comparison of disparity among three subgroups using standard deviations of BI (**c**) and CI (**d**: CI is calculated differently for avialan and non-avian taxa; **e**: CI is calculated the same way for avialan and non-avian taxa). The boxes represent the median, the first and the third quartile of the morphological disparity ( $n = 109$  species). Morphological disparity was compared using Welch's  $t$ -test for statistical significance (\*\*\*\*two-sided  $p$ -value threshold  $<0.05$ ).

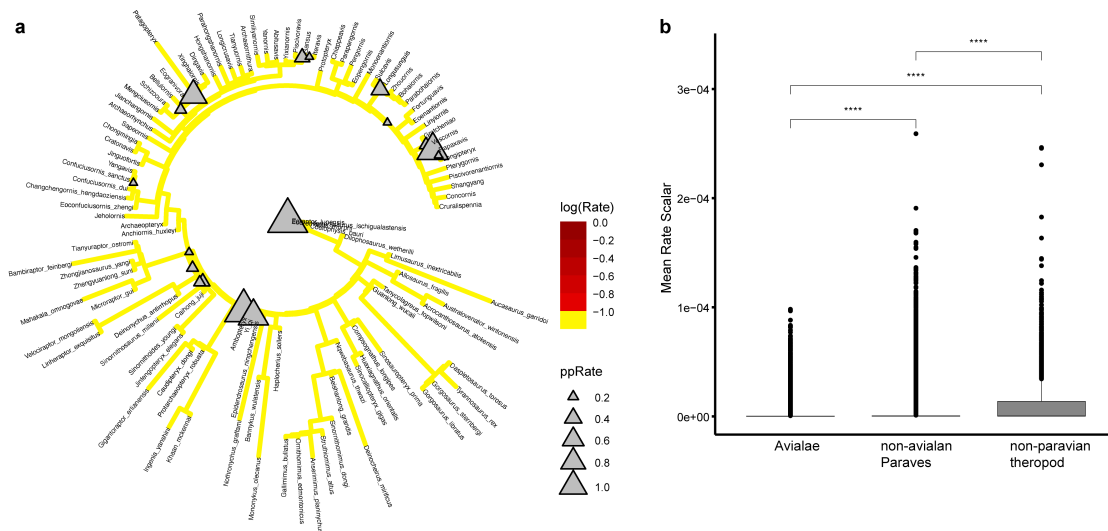

**Supplementary Fig. 10. Evolutionary rate and rate shift of appendicular elements of Mesozoic theropods.** The result is derived from super tree III. **a**, Branch specific evolutionary rates and rate shifts of all limb elements (Branch specific evolutionary rates are denoted by the color gradients. Posterior probabilities of rate shifts are indicated by the relative size of the grey triangles). **b**, Comparison of evolutionary rate of subgroups of Mesozoic theropods (The boxes represent the median, the first and the third quartile of the mean rate scalar;  $n = 109$  species). The mean rate scalar is the mean of the rate scalars calculated in the post-burn-in posterior distribution under the variable rate evolutionary model. Evolutionary rate among subgroups were compared using a nonparametric t-test for statistical significance (\*\*\*\*:  $p < 0.00005$ ).

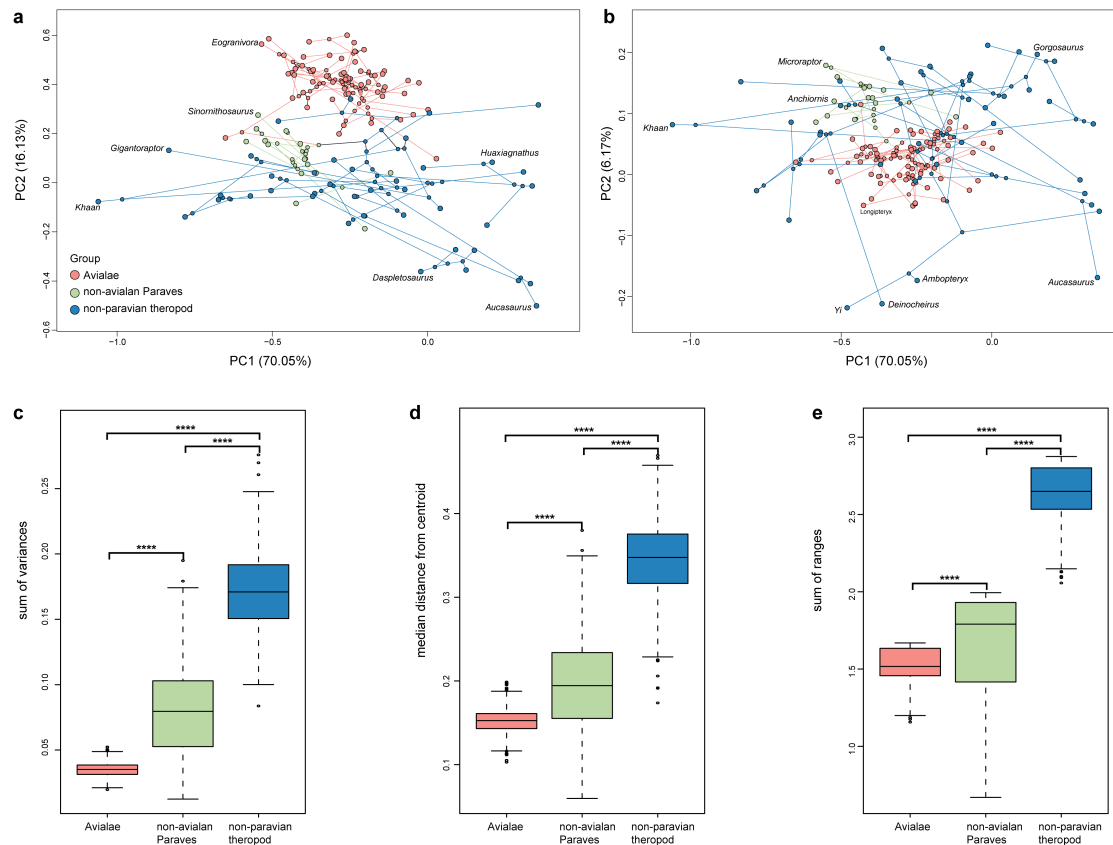

**Supplementary Fig. 11. Morphological disparity of appendicular elements of Mesozoic theropods.** The result is derived from super tree IV. **a, b**, Phylomorphospace of the first three principal components (PCs) of both fore- and hindlimb elements. **c–e**, Comparison of morphological disparity among subgroups of Mesozoic theropods (The boxes represent the median, the first and the third quartile of the morphological disparity;  $n = 109$  species): sum of variances (**c**), median distance from centroid (**d**), and sum of ranges (**e**). Morphological disparity was compared using Welch's  $t$ -test for statistical significance (\*\*\*\*two-sided  $p$ -value threshold  $<0.05$ ).

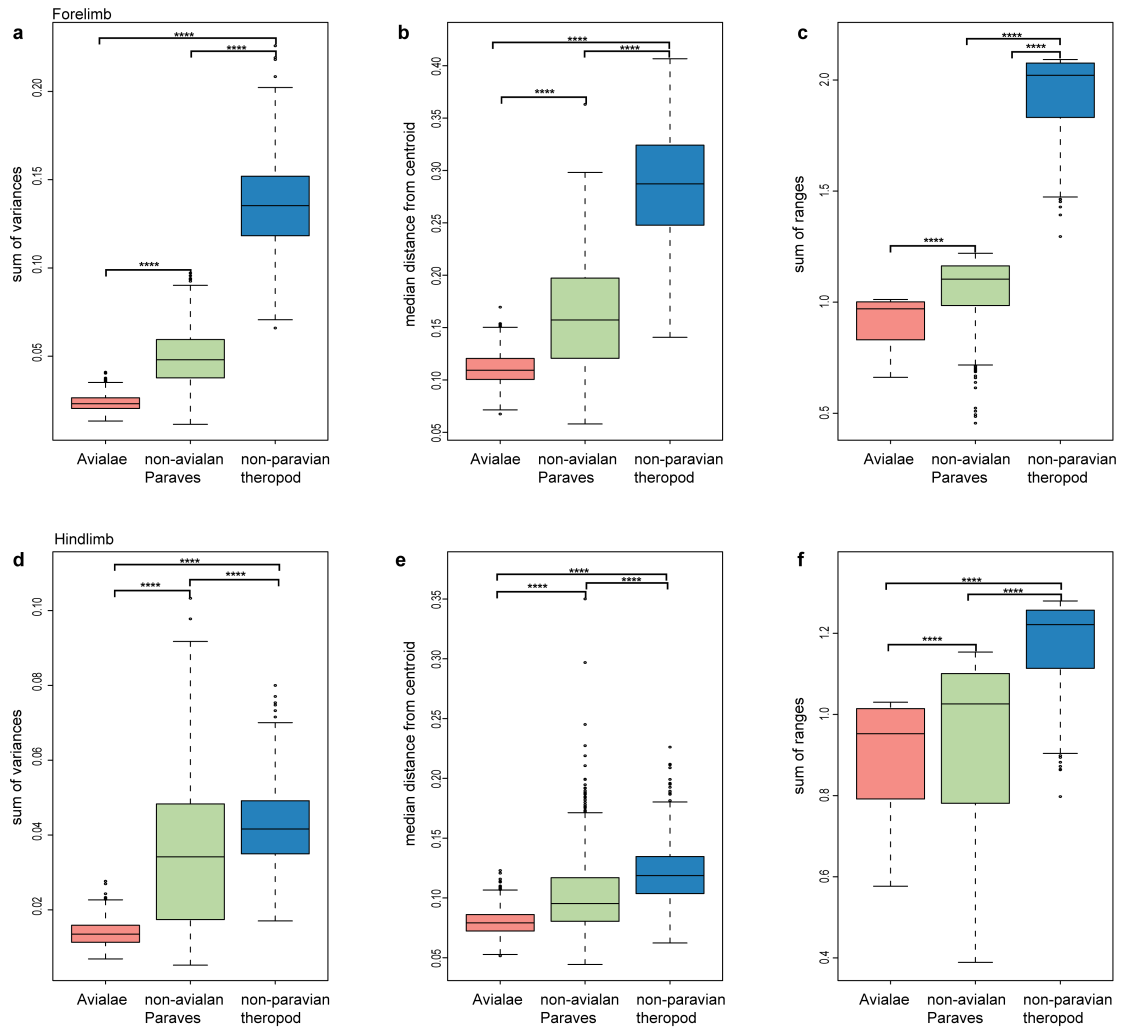

**Supplementary Fig. 12. Comparison of morphological disparity of forelimb and hindlimb among Mesozoic theropods.** The result is derived from super tree IV. **a–c**, Forelimb. **d–e**, Hindlimb. Morphological disparity is quantified using three metrics: sum of variances (**a**, **d**), median distance from centroid (**b**, **e**), and sum of ranges (**c**, **f**). The boxes represent the median, the first and the third quartile of the morphological disparity;  $n = 109$  species (**a–f**). Morphological disparity was compared using Welch’s  $t$ -test for statistical significance (\*\*\*\*two-sided  $p$ -value threshold  $< 0.05$ ).

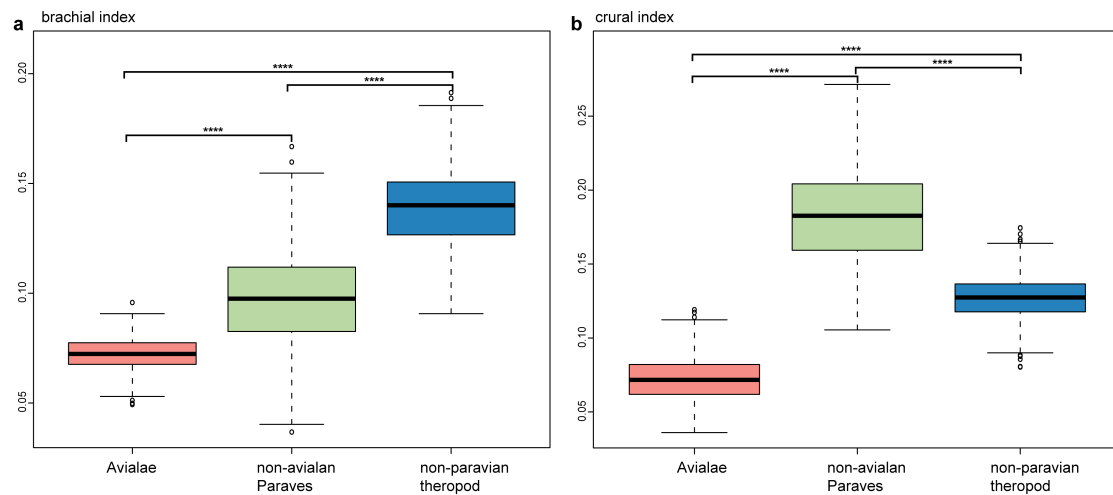

**Supplementary Fig. 13. Comparison of two functional indices of Mesozoic theropods.** The result is derived from super tree IV. **a**, Branchial index. **c**, Crural index (CI is calculated differently for avialan and non-avian taxa; see Method). The boxes represent the median, the first and the third quartile of the morphological disparity;  $n = 109$  species (**a,b**) Morphological disparity was compared using Welch's  $t$ -test for statistical significance (\*\*\*\*two-sided  $p$ -value threshold  $<0.05$ ).

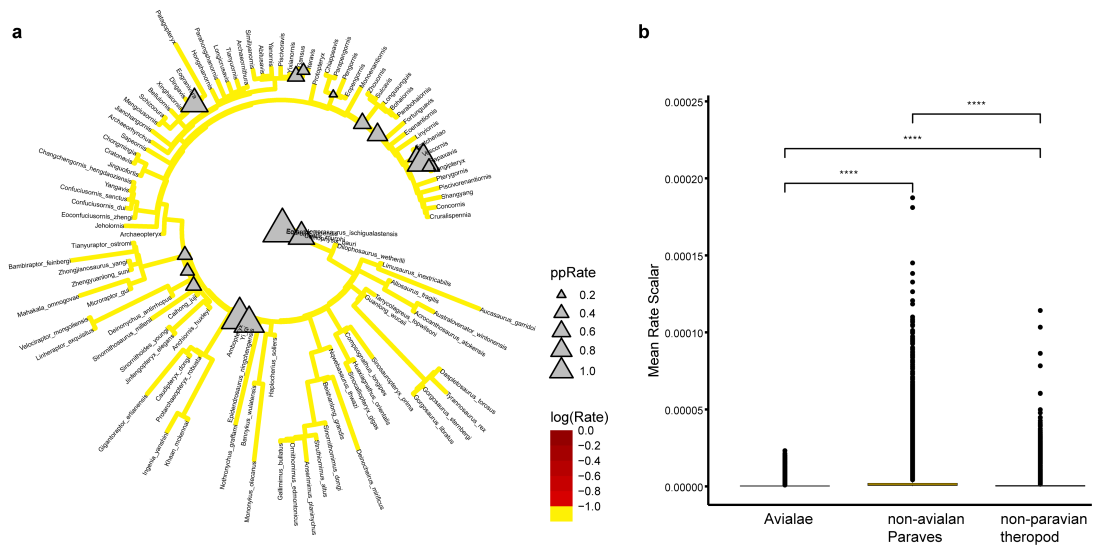

**Supplementary Fig. 14. Evolutionary rate and rate shift of appendicular elements of Mesozoic theropods.** The result is derived from super tree IV. **a**, Branch specific evolutionary rates and rate shifts of all limb elements (Branch specific evolutionary rates are denoted by the color gradients. Posterior probabilities of rate shifts are indicated by the relative size of the grey triangles). **b**, Comparison of evolutionary rate of subgroups of Mesozoic theropods (The boxes represent the median, the first and the third quartile of the mean rate scalar;  $n = 109$  species). The mean rate scalar is the mean of the rate scalars calculated in the post-burn-in posterior distribution under the variable rate evolutionary model. Evolutionary rate among subgroups were compared using a nonparametric t-test for statistical significance (\*\*\*\*:  $p < 0.00005$ ).



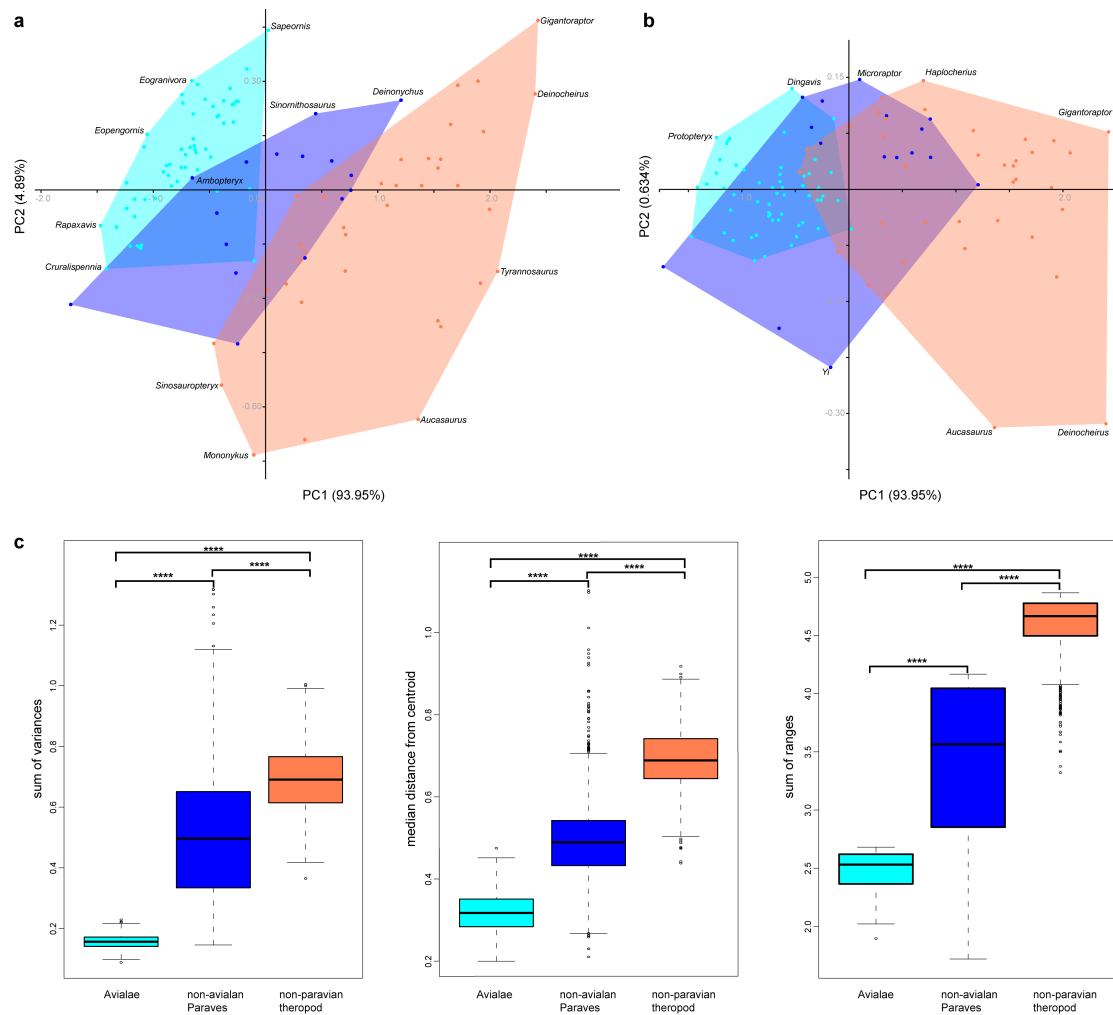

**Supplementary Fig. 15. Morphological disparity of appendicular elements of Mesozoic theropods.** The result is derived from super tree I. **a, b**, Morphospace of the first three principal components (PCs) of both fore- and hindlimb elements derived from conventional PCA. **c**, Comparison of morphological disparity among subgroups of Mesozoic theropods (The boxes represent the median, the first and the third quartile of the morphological disparity;  $n = 109$  species). Morphological disparity was compared using Welch's  $t$ -test for statistical significance (\*\*\*\*two-sided  $p$ -value threshold  $< 0.05$ ).

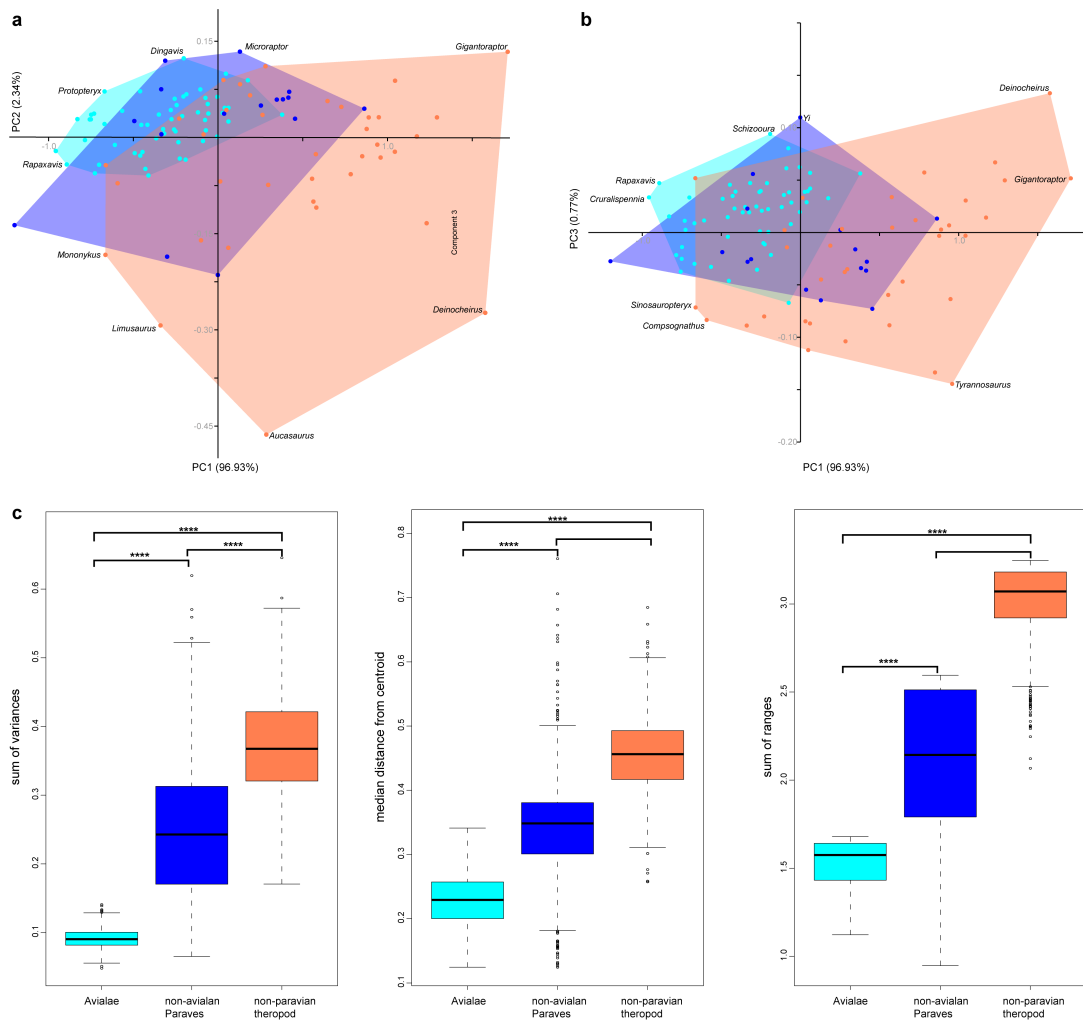

### Supplementary Fig. 16. Morphological disparity of forelimb of Mesozoic

**theropods.** The result is derived from super tree I. **a, b**, Morphospace of the first three principal components (PCs) of forelimb elements derived from conventional PCA. **c**, Comparison of morphological disparity among subgroups of Mesozoic theropods (The boxes represent the median, the first and the third quartile of the morphological disparity;  $n = 109$  species). Morphological disparity was compared using Welch's  $t$ -test for statistical significance (\*\*\*two-sided  $p$ -value threshold  $< 0.05$ ).

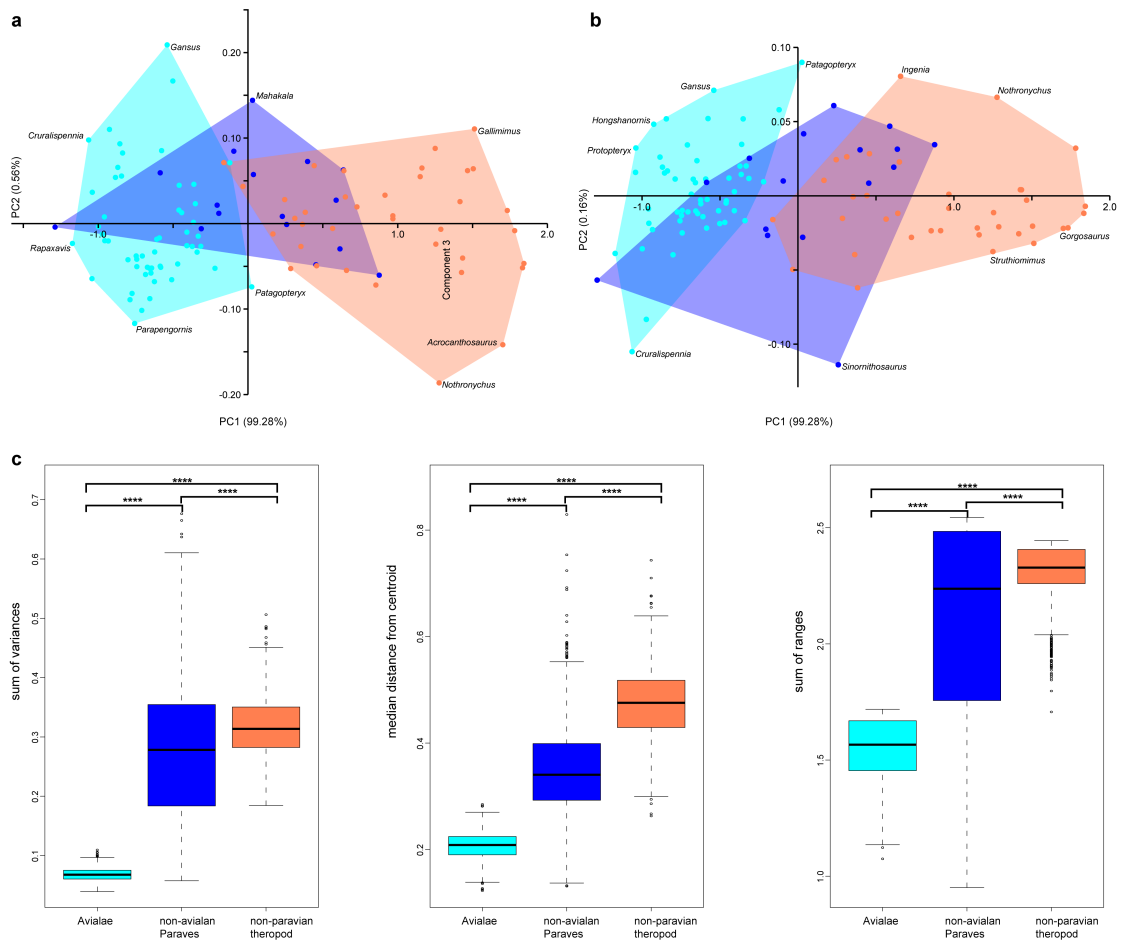

### Supplementary Fig. 18. Morphological disparity of hindlimb of Mesozoic

**theropods.** The result is derived from super tree I. **a, b**, Morphospace of the first three principal components (PCs) of hindlimb elements derived from conventional PCA. **c**, Comparison of morphological disparity among subgroups of Mesozoic theropods (The boxes represent the median, the first and the third quartile of the morphological disparity;  $n = 109$  species). Morphological disparity was compared using Welch's  $t$ -test for statistical significance (\*\*\*\*two-sided  $p$ -value threshold  $< 0.05$ ).

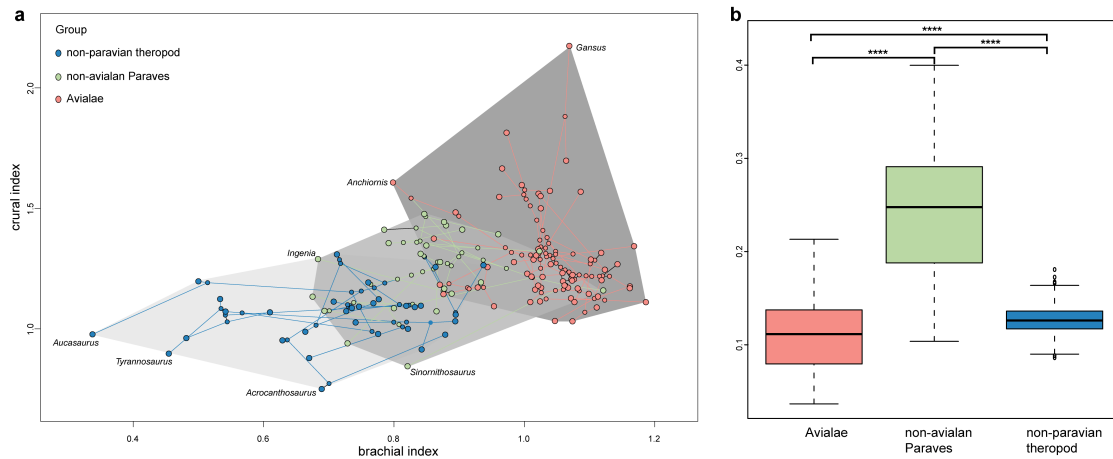

**Supplementary Fig. 18. Evolutionary changes of brachial (BI) and crural (CI)**

**indices across Mesozoic theropod phylogeny.** The result is derived from super tree

I. **a**, Phylomorphospace of BI and crural CI (CI is calculated the same way for avialan and non-avian taxa; see Method); **b**, Comparison of disparity among three subgroups using standard deviations (The boxes represent the median, the first and the third quartile of the morphological disparity;  $n = 109$  species). Morphological disparity was compared using Welch's  $t$ -test for statistical significance (\*\*\*\*two-sided  $p$ -value threshold  $<0.05$ ).

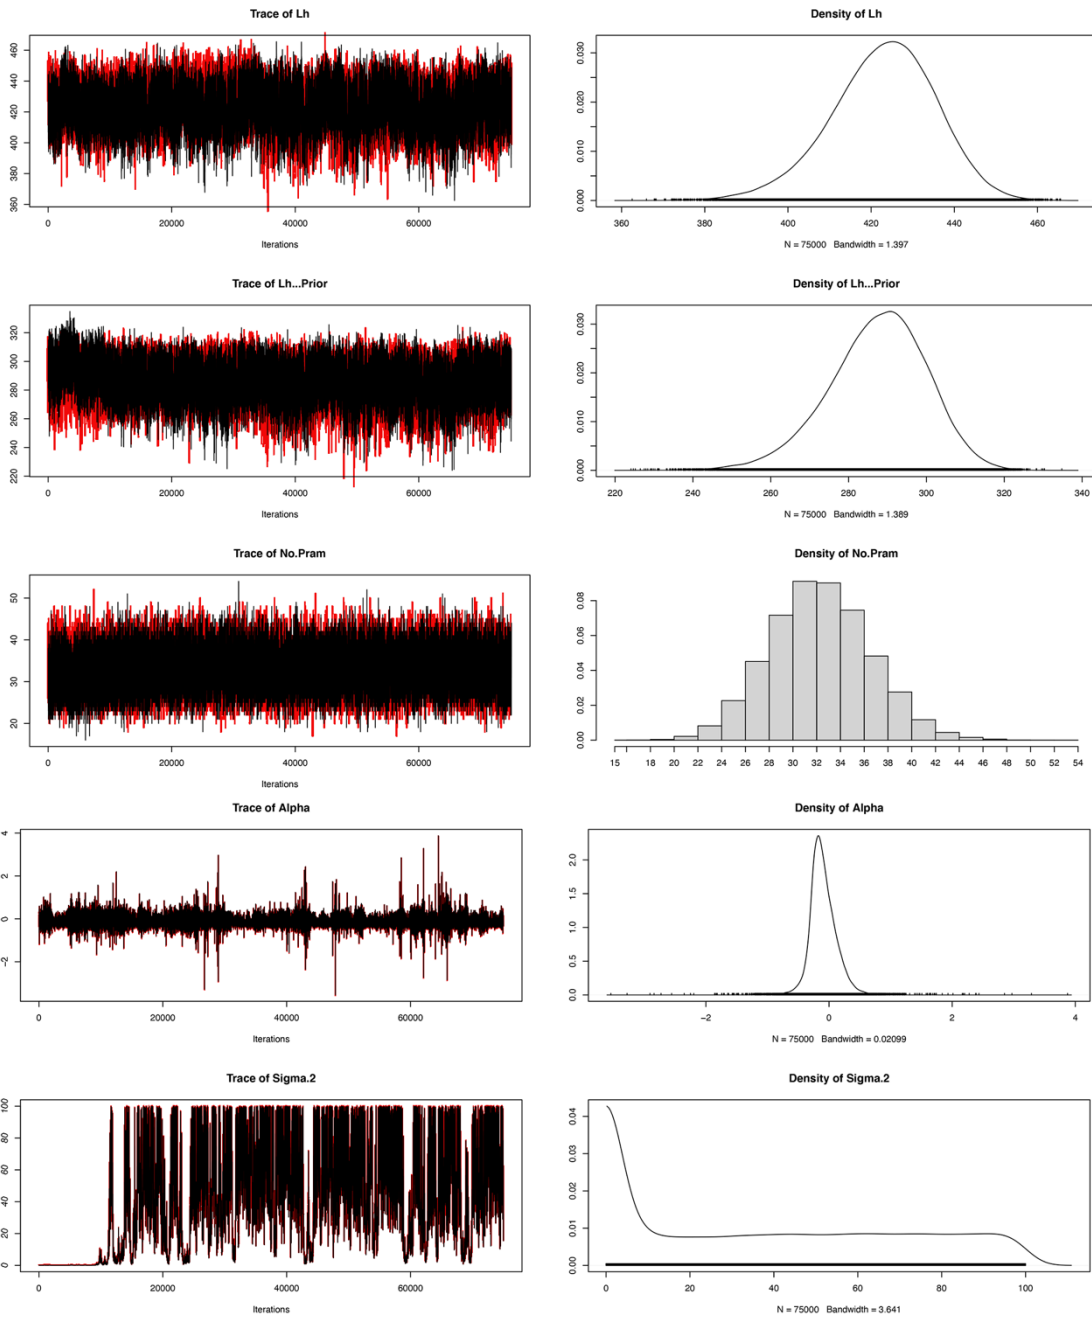

**Supplementary Fig. 19. Results of trace plot and Gelman and Rubin's convergence diagnostic for checking parameter and model convergence for two independent rjMCMC analyses of all limb measurements.**

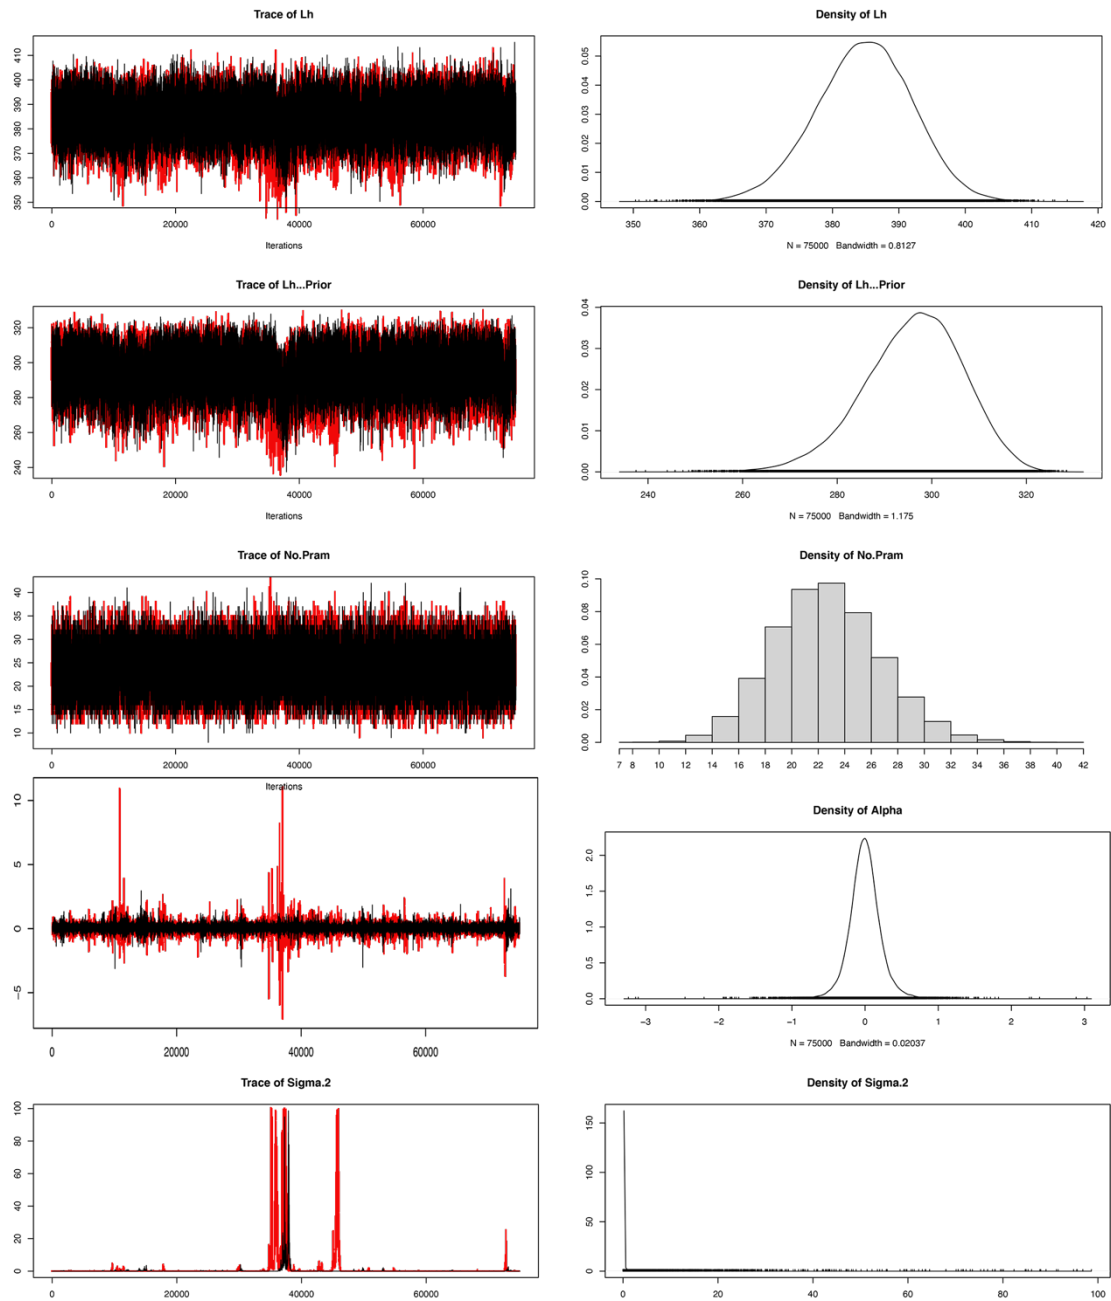

**Supplementary Fig. 20. Results of trace plot and Gelman and Rubin's convergence diagnostic for checking parameter and model convergence for two independent rjMCMC analyses of forelimb measurements.**

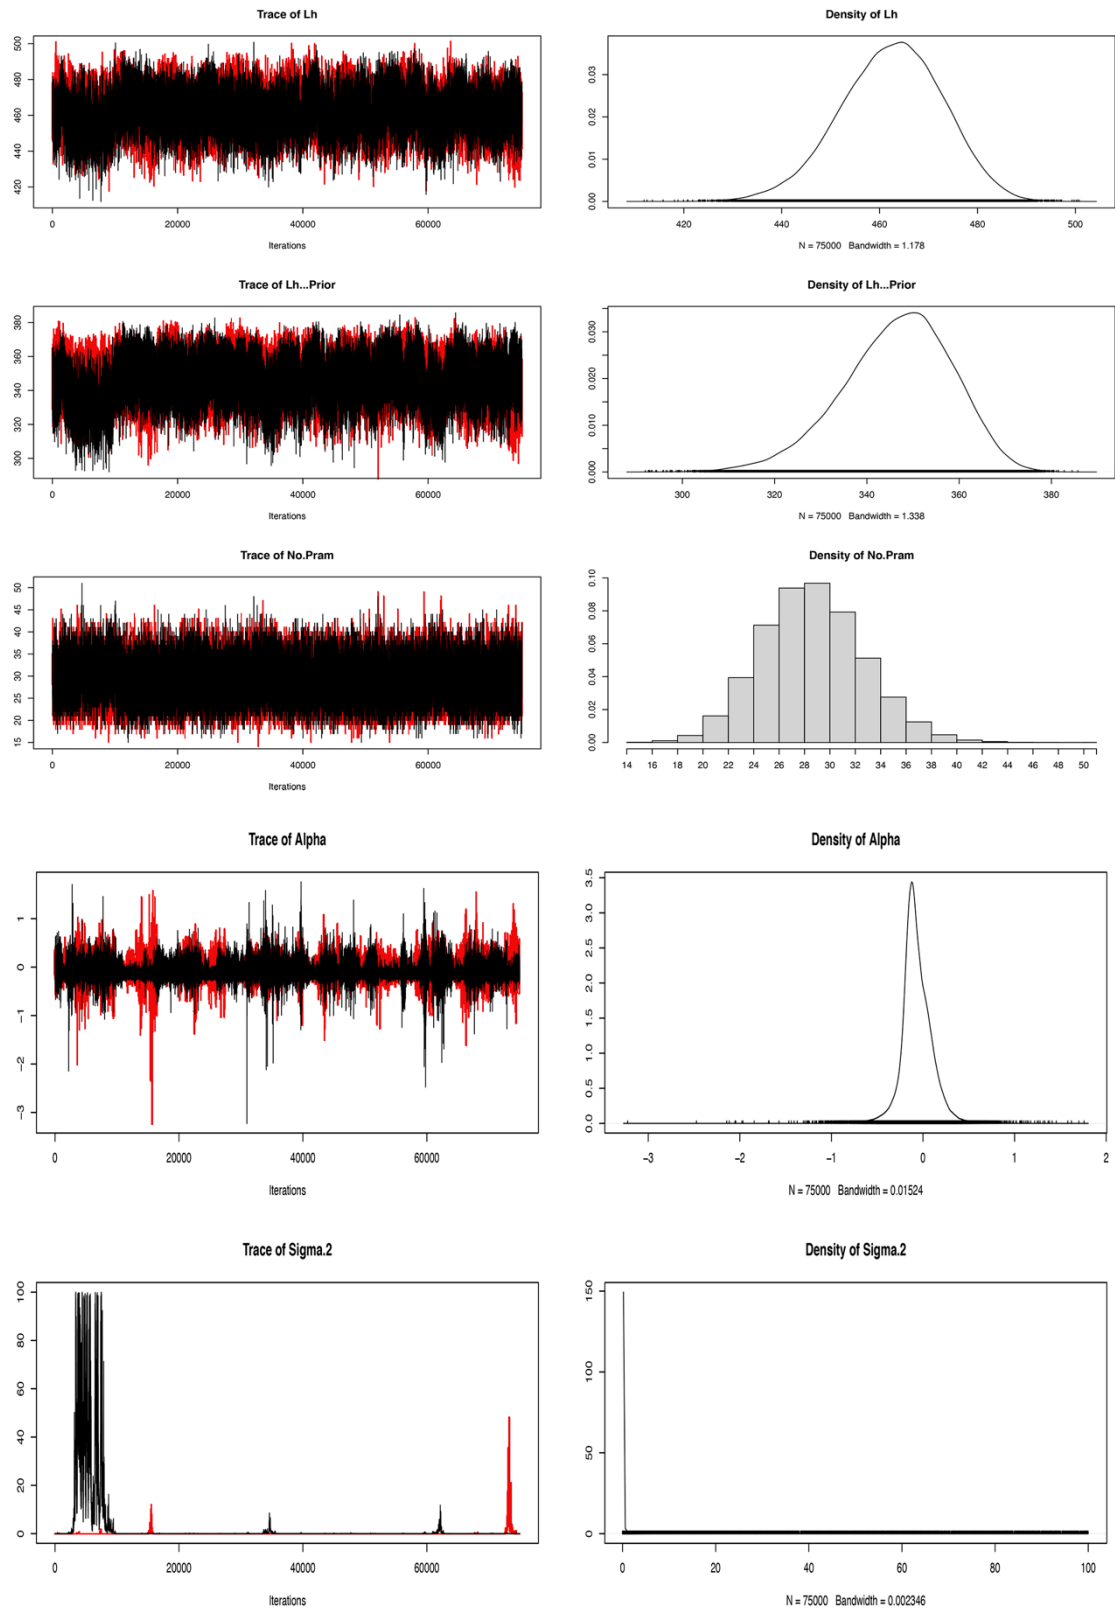

**Supplementary Fig. 21. Results of trace plot and Gelman and Rubin's convergence diagnostic for checking parameter and model convergence for two independent rjMCMC analyses of hindlimb measurements.**

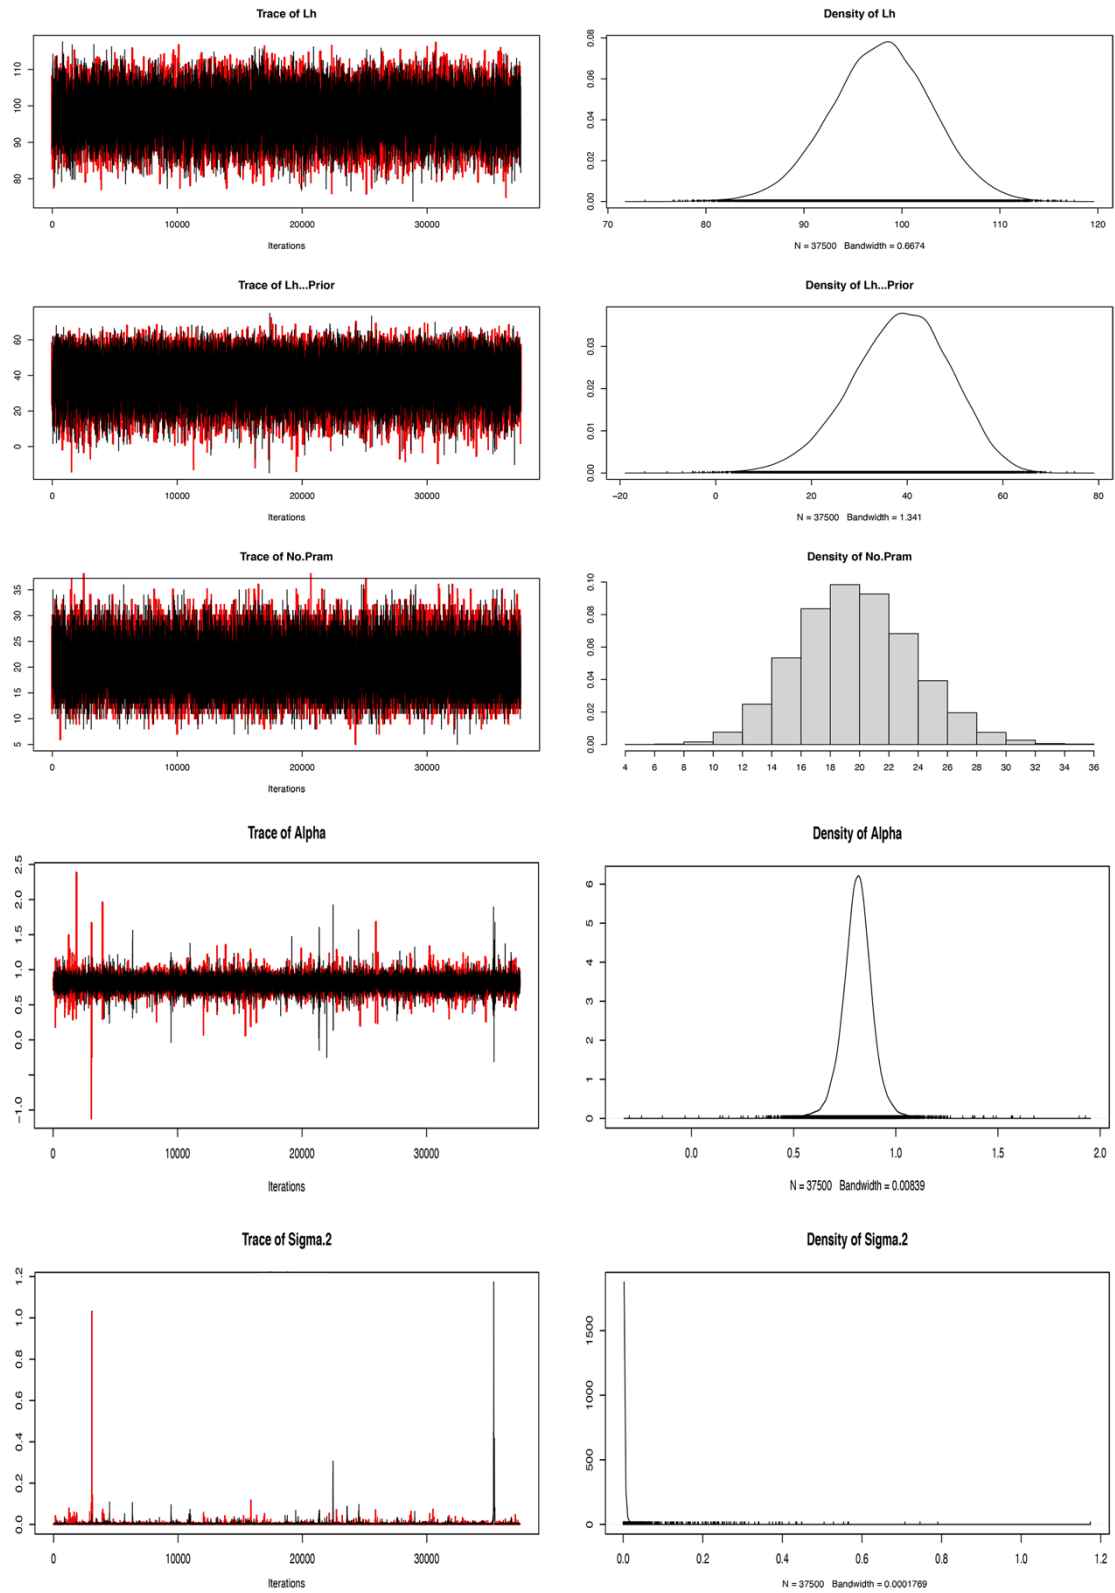

**Supplementary Fig. 22. Results of trace plot and Gelman and Rubin's convergence diagnostic for checking parameter and model convergence for two independent rjMCMC analyses of brachial index.**



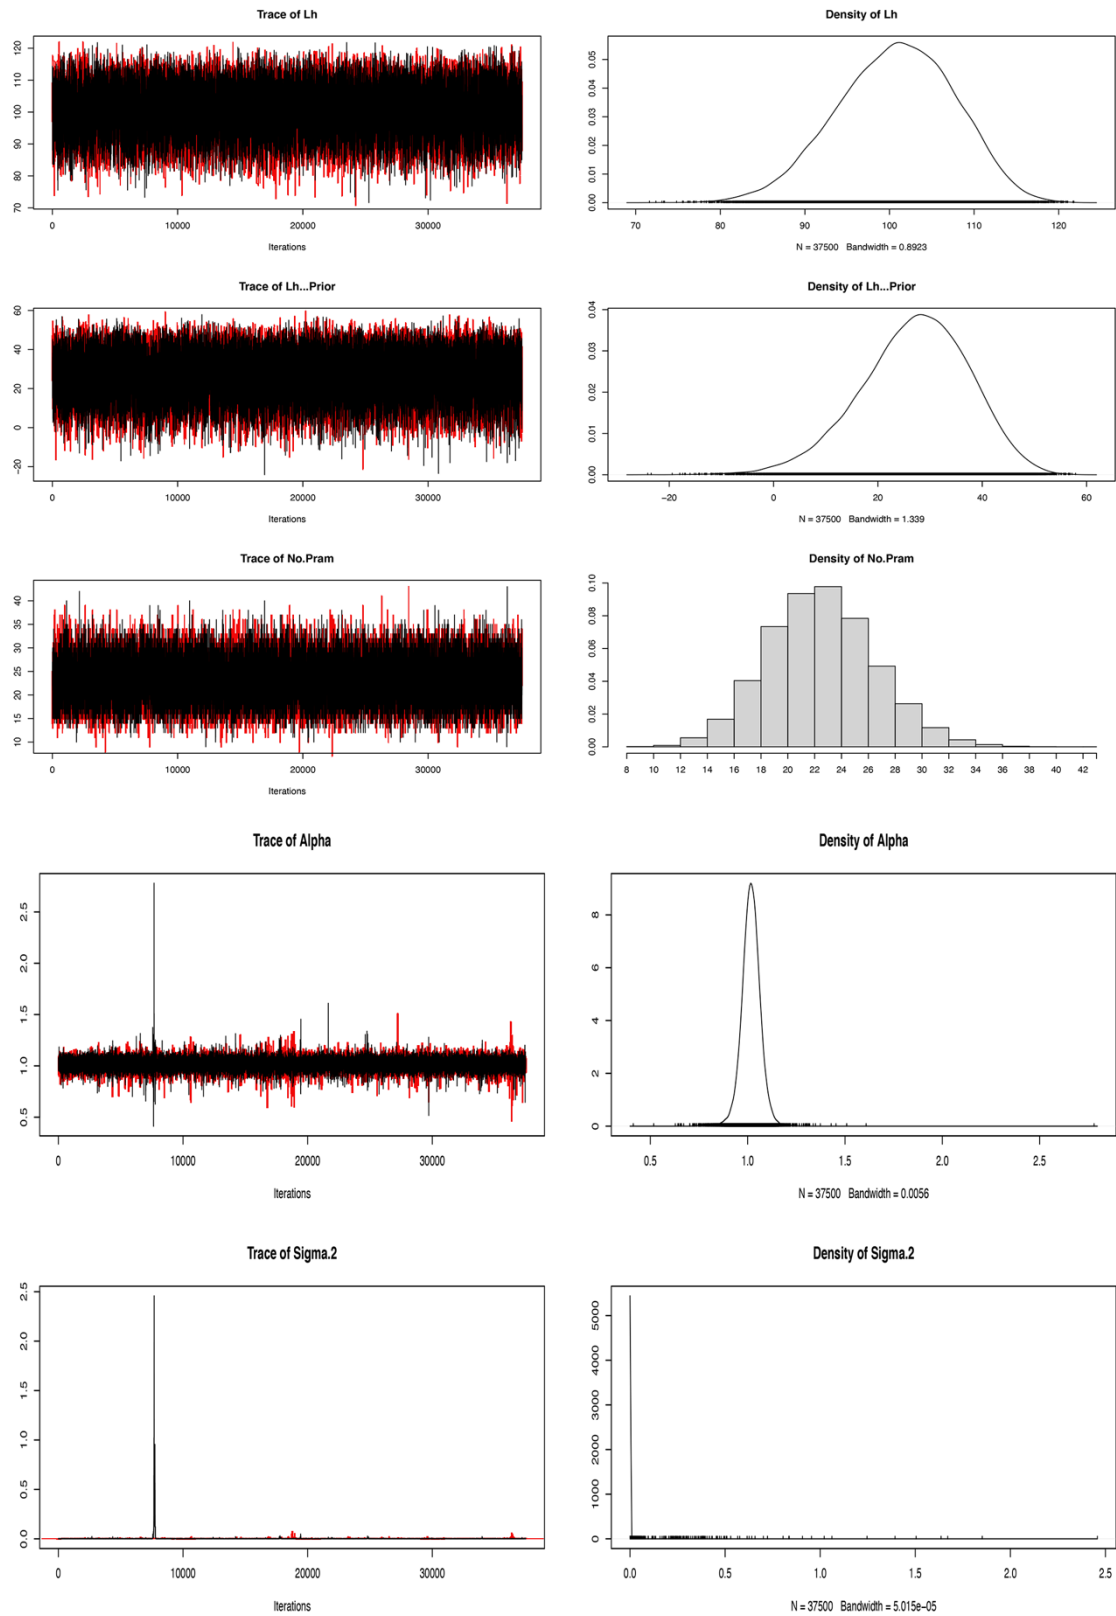

**Supplementary Fig. 23. Results of trace plot and Gelman and Rubin's convergence diagnostic for checking parameter and model convergence for two independent rjMCMC analyses of crural index.**

**Supplementary Table 1.** List of taxonomical sampling (in separated Excel file)

**Supplementary Table 2.** Results of phylogenetically principal components analysis using the all limb elements of Mesozoic theropods. The phylogeny backbone derived from the “mbl”-scaled super tree I.

|                             | PC1    | PC2    | PC3    | PC4    | PC5    | PC6    |
|-----------------------------|--------|--------|--------|--------|--------|--------|
| Standard deviation          | 0.0821 | 0.0398 | 0.0254 | 0.0187 | 0.0136 | 0.0109 |
| Proportion of Variance      | 0.7003 | 0.1647 | 0.0670 | 0.0363 | 0.0193 | 0.0124 |
| Cumulative proportion       | 0.7003 | 0.8650 | 0.9320 | 0.9683 | 0.9876 | 1.0000 |
| Eigenvector<br>coefficients |        |        |        |        |        |        |
| Humerus                     | -0.895 | 0.197  | 0.318  | -0.018 | 0.236  | 0.061  |
| Ulna                        | -0.894 | 0.286  | -0.270 | 0.058  | -0.198 | -0.065 |
| Metacarpal III              | -0.849 | 0.369  | 0.377  | 0.023  | 0.017  | 0.014  |
| Femur                       | -0.809 | -0.403 | 0.024  | -0.400 | -0.098 | 0.116  |
| Tibia                       | -0.800 | -0.523 | 0.080  | -0.064 | 0.101  | -0.259 |
| Metatarsal III              | -0.722 | -0.608 | 0.037  | 0.311  | -0.030 | 0.100  |

**Supplementary Table 3.** Results of permanova statistic test of Mesozoic theropods in phylomorphospace of limb elements. The phylogeny backbone derived from the “mbl”-scaled super tree I. (\*two-sided  $p$ -value threshold  $<0.05$ )

| pairwise comparison                           | $F$ Model | $R^2$ | $p$ (adjusted) |
|-----------------------------------------------|-----------|-------|----------------|
| <b>All limbs</b>                              |           |       |                |
| Avialae: non-avialan Paraves                  | 11.969    | 0.146 | 0.003*         |
| Avialae: non-paravian theropod                | 22.833    | 0.202 | 0.003*         |
| non-avialan Paraves: non-paravian<br>theropod | 4.719     | 0.083 | 0.003*         |
| <b>Forelimb</b>                               |           |       |                |
| Avialae: non-avialan Paraves                  | 2.653     | 0.037 | 0.171          |
| Avialae: non-paravian theropod                | 19.609    | 0.179 | 0.003*         |
| non-avialan Paraves: non-paravian<br>theropod | 4.540     | 0.080 | 0.003*         |
| <b>Hindlimb</b>                               |           |       |                |
| Avialae: non-avialan Paraves                  | 23.564    | 0.252 | 0.003*         |
| Avialae: non-paravian theropod                | 36.798    | 0.290 | 0.003*         |
| non-avialan Paraves: non-paravian<br>theropod | 1.628     | 0.030 | 0.066          |

**Supplementary Table 4.** Results of conventional principal components analysis using the all limb, forelimb, and hindlimb of Mesozoic theropods.

|                          | PC1    | PC2    | PC3    | PC4    | PC5    | PC6    |
|--------------------------|--------|--------|--------|--------|--------|--------|
| <b>All limb</b>          |        |        |        |        |        |        |
| Proportion of Variance   | 0.9394 | 0.0489 | 0.0063 | 0.0032 | 0.0011 | 0.0009 |
| Eigenvector coefficients |        |        |        |        |        |        |
| Humerus                  | 0.363  | 0.325  | -0.517 | 0.081  | -0.496 | -0.493 |
| Ulna                     | 0.292  | 0.533  | -0.339 | 0.235  | 0.447  | 0.510  |
| Metacarpal III           | 0.298  | 0.565  | 0.734  | -0.166 | -0.056 | -0.148 |
| Femur                    | 0.508  | -0.266 | -0.155 | -0.678 | 0.403  | -0.156 |
| Tibia                    | 0.468  | -0.286 | 0.102  | -0.036 | -0.563 | 0.609  |
| Metatarsal III           | 0.466  | -0.371 | 0.212  | 0.670  | 0.267  | -0.282 |
| <b>Forelimb only</b>     |        |        |        |        |        |        |
| Eigenvector coefficients |        |        |        |        |        |        |
| Proportion of Variance   | 0.969  | 0.024  | 0.007  |        |        |        |
| Humerus                  | 0.632  | -0.625 | -0.458 |        |        |        |
| Ulna                     | 0.542  | -0.065 | 0.837  |        |        |        |
| Metacarpal III           | 0.554  | 0.777  | -0.298 |        |        |        |
| <b>Hindlimb only</b>     |        |        |        |        |        |        |
| Proportion of Variance   | 0.993  | 0.005  | 0.002  |        |        |        |
| Eigenvector coefficients |        |        |        |        |        |        |
| Femur                    | 0.608  | -0.684 | -0.404 |        |        |        |
| Tibia                    | 0.561  | 0.009  | 0.828  |        |        |        |
| Metatarsal III           | 0.5628 | 0.730  | -0.389 |        |        |        |

**Supplementary Table 5.** Results of phylogenetically principal components analysis of the forelimb and hindlimb of Mesozoic theropods, separately. The phylogeny backbone derived from the “mbl”-scaled super tree I.

|                          | PC1    | PC2    | PC3    |
|--------------------------|--------|--------|--------|
| <b>Forelimb</b>          |        |        |        |
| Standard deviation       | 0.0707 | 0.0257 | 0.0136 |
| Proportion of Variance   | 0.8553 | 0.1132 | 0.0315 |
| Cumulative proportion    | 0.8553 | 0.9685 | 1.0000 |
| Eigenvector coefficients |        |        |        |
| Humerus                  | 0.918  | -0.314 | 0.240  |
| Ulna                     | 0.944  | -0.245 | -0.223 |
| Metacarpal III           | 0.914  | 0.405  | 0.019  |
| <b>Hindlimb</b>          |        |        |        |
| Standard deviation       | 0.0545 | 0.0210 | 0.0116 |
| Proportion of Variance   | 0.8380 | 0.1243 | 0.0377 |
| Cumulative proportion    | 0.8380 | 0.9623 | 1.0000 |
| Eigenvector coefficients |        |        |        |
| Femur                    | -0.886 | 0.445  | 0.129  |
| Tibia                    | -0.952 | 0.008  | -0.303 |
| Metatarsal III           | -0.913 | -0.389 | 0.126  |

**Supplementary Table 6.** Results of Welch’s t-test of Mesozoic theropods in disparity metrics of all limb elements. The phylogeny backbone derived from the “mbl”-scaled super tree I. (\*two-sided  $p$ -value threshold  $<0.05$ )

| pairwise comparison                           | t       | df     | $p$       |
|-----------------------------------------------|---------|--------|-----------|
| <b>Sum of variances</b>                       |         |        |           |
| Avialae: non-avialan Paraves                  | -44.16  | 1066.4 | 2.2e-16*  |
| Avialae: non-paravian theropod                | -144.32 | 1079.1 | 2.2e-16*  |
| non-avialan Paraves: non-paravian<br>theropod | -66.415 | 1983.3 | 2.2e-16*  |
| <b>Median distance from centroids</b>         |         |        |           |
| Avialae: non-avialan Paraves                  | -32.889 | 1173.6 | 2.2e-16*  |
| Avialae: non-paravian theropod                | -120.45 | 1191.5 | 2.2e-16*  |
| non-avialan Paraves: non-paravian<br>theropod | -62.109 | 1993.1 | 2.2e-16*  |
| <b>Sum of ranges</b>                          |         |        |           |
| Avialae: non-avialan Paraves                  | -4.5494 | 1398.3 | 5.85e-06* |
| Avialae: non-paravian theropod                | -143.46 | 1665.4 | 2.2e-16*  |
| non-avialan Paraves: non-paravian<br>theropod | -96.186 | 1839   | 2.2e-16*  |

**Supplementary Table 7.** Results of Welch’s t-test of Mesozoic theropods in disparity metrics of forelimb elements. The phylogeny backbone derived from the “mbl”-scaled super tree I. (\*two-sided  $p$ -value threshold  $<0.05$ )

| pairwise comparison                           | t       | df     | $p$       |
|-----------------------------------------------|---------|--------|-----------|
| <b>Sum of variances</b>                       |         |        |           |
| Avialae: non-avialan Paraves                  | -53.878 | 1176.3 | 2.2e-16*  |
| Avialae: non-paravian theropod                | -136.14 | 1057.4 | 2.2e-16*  |
| non-avialan Paraves: non-paravian<br>theropod | -91.984 | 1589.2 | 2.2e-16*  |
| <b>Median distance from centroids</b>         |         |        |           |
| Avialae: non-avialan Paraves                  | -42.455 | 1181.7 | 2.2e-16*  |
| Avialae: non-paravian theropod                | -105.24 | 1142.4 | 2.2e-16*  |
| non-avialan Paraves: non-paravian<br>theropod | -52.228 | 1968.6 | 2.2e-16*  |
| <b>Sum of ranges</b>                          |         |        |           |
| Avialae: non-avialan Paraves                  | -22.294 | 1948.3 | 5.85e-06* |
| Avialae: non-paravian theropod                | -171.9  | 1650.5 | 2.2e-16*  |
| non-avialan Paraves: non-paravian<br>theropod | -146.65 | 1809.5 | 2.2e-16*  |

**Supplementary Table 8.** Results of Welch’s t-test of Mesozoic theropods in disparity metrics of hindlimb elements. The phylogeny backbone derived from the “mbl”-scaled super tree I. (\*two-sided  $p$ -value threshold  $<0.05$ )

| pairwise comparison                           | t       | df     | $p$        |
|-----------------------------------------------|---------|--------|------------|
| <b>Sum of variances</b>                       |         |        |            |
| Avialae: non-avialan Paraves                  | -31.124 | 1093.6 | 2.2e-16*   |
| Avialae: non-paravian theropod                | -73.551 | 1259.9 | 2.2e-16*   |
| non-avialan Paraves: non-paravian<br>theropod | -12.818 | 1631.9 | 2.2e-16*   |
| <b>Median distance from centroids</b>         |         |        |            |
| Avialae: non-avialan Paraves                  | -21.109 | 1395.6 | 2.2e-16*   |
| Avialae: non-paravian theropod                | -44.385 | 1687.5 | 2.2e-16*   |
| non-avialan Paraves: non-paravian<br>theropod | -11.853 | 1815.1 | 2.2e-16*   |
| <b>Sum of ranges</b>                          |         |        |            |
| Avialae: non-avialan Paraves                  | 5.9162  | 1384.2 | 4.147e-09* |
| Avialae: non-paravian theropod                | -53.515 | 1860.5 | 2.2e-16*   |
| non-avialan Paraves: non-paravian<br>theropod | -39.758 | 1622.3 | 2.2e-16*   |



**Supplementary Table 9.** Results of permanova statistic test of Mesozoic theropods in morphospace of limb elements from conventional PCA. (\*two-sided  $p$ -value threshold <0.05)

| pairwise comparison                           | $F$ Model | $R^2$ | $p$ (adjusted) |
|-----------------------------------------------|-----------|-------|----------------|
| <b>All limbs</b>                              |           |       |                |
| Avialae: non-avialan Paraves                  | 13.307    | 0.160 | 0.003*         |
| Avialae: non-paravian theropod                | 25.289    | 0.217 | 0.003*         |
| non-avialan Paraves: non-paravian<br>theropod | 6.600     | 0.114 | 0.003*         |
| <b>Forelimb</b>                               |           |       |                |
| Avialae: non-avialan Paraves                  | 7.236     | 0.094 | 0.009*         |
| Avialae: non-paravian theropod                | 33.591    | 0.270 | 0.003*         |
| non-avialan Paraves: non-paravian<br>theropod | 5.597     | 0.099 | 0.018*         |
| <b>Hindlimb</b>                               |           |       |                |
| Avialae: non-avialan Paraves                  | 22.328    | 0.242 | 0.003*         |
| Avialae: non-paravian theropod                | 59.506    | 0.395 | 0.003*         |
| non-avialan Paraves: non-paravian<br>theropod | 10.291    | 0.168 | 0.003*         |

**Supplementary Table 10.** Results of Welch’s t-test of Mesozoic theropods in brachial index (BI) and crural index (CI). For comparison, CI\_1 was calculated as differently for avialan and non-avialan theropods; CI\_2 was calculated as the length ratio between tibiotarsus and femur for all taxa (see Methods for detail). The phylogeny backbone derived from the “mbl”-scaled super tree I. (\*two-sided *p*-value threshold <0.05)

| pairwise comparison                           | t       | df      | <i>p</i> |
|-----------------------------------------------|---------|---------|----------|
| <b>BI</b>                                     |         |         |          |
| Avialae: non-avialan Paraves                  | -28.47  | 1284.6  | 2.2e-16* |
| Avialae: non-paravian theropod                | -95.421 | 1418.1  | 2.2e-16* |
| non-avialan Paraves: non-paravian<br>theropod | -42.941 | 1919.6  | 2.2e-16* |
| <b>CI_1</b>                                   |         |         |          |
| Avialae: non-avialan Paraves                  | -58.953 | 1551.8  | 2.2e-16* |
| Avialae: non-paravian theropod                | -14.946 | 1354.8  | 2.2e-16* |
| non-avialan Paraves: non-paravian<br>theropod | 56.773  | 1109.7  | 2.2e-16* |
| <b>CI_2</b>                                   |         |         |          |
| Avialae: non-avialan Paraves                  | 35.415  | 1986.7  | 2.2e-16* |
| Avialae: non-paravian theropod                | 79.337  | 1381.1  | 2.2e-16* |
| non-avialan Paraves: non-paravian<br>theropod | 37.483  | 1437.5, | 2.2e-16* |

**Supplementary Table 11.** Effective sample size of two independent runs for all limbs, forelimb, hindlimb, brachial index (BI), and crural index (CI), respectively, using the Gelman and Rubin's convergence diagnostic.

|          |         | Lh        | Lh Prior   | No. Pram   | Alpha      | Sigma.2  |
|----------|---------|-----------|------------|------------|------------|----------|
| All limb | Chain 1 | 1517.6504 | 1205.1763  | 6428.4940  | 7617.2571  | 148.4034 |
|          | Chain 2 | 1460.5074 | 2128.3959  | 10135.5387 | 9704.0152  | 318.1652 |
| Forelimb | Chain 1 | 3925.7345 | 2662.1496  | 9180.1502  | 35612.9061 | 314.6418 |
|          | Chain 2 | 1851.4398 | 1208.0387  | 8977.7930  | 49586.7965 | 117.1335 |
| Hindlimb | Chain 1 | 1429.9538 | 691.3173   | 7815.7435  | 4988.8258  | 100.0593 |
|          | Chain 2 | 2031.6816 | 1512.8994  | 10415.5941 | 4484.4215  | 259.6385 |
| BI       | Chain 1 | 7784.9700 | 14199.3544 | 11439.3808 | 30112.7097 | 343.1401 |
|          | Chain 2 | 8317.9105 | 13531.0866 | 8753.8852  | 26273.4636 | 810.0119 |
| CI       | Chain 1 | 5375.4899 | 14659.3422 | 9146.8541  | 36672.2498 | 420.8991 |
|          | Chain 2 | 5454.1912 | 14211.4586 | 11691.2240 | 36354.6807 | 353.8873 |
